# Supplementary material for: Highly efficient and stable planar perovskite solar cells with K3[Fe(CN)6]-doped spiro-OMeTAD
Source: Royal Society of Chemistry journal article supplement (doi:10.1039/d1tc01284c), 2021-01-01
Supplement: d1tc01284c1.pdf [file d1tc01284c1.pdf]

## Supporting Information for

# Highly efficient and stable planar perovskite solar cells enabled by $\text{K}_3[\text{Fe}(\text{CN})_6]$ -doped spiro-OMeTAD

Weihai Sun, Mingjing Zhang, Shibo Wang, Fengxian Cao, Jinjun Zou, Yitian Du, Zhang Lan,  
Jihuai Wu\*

*Engineering Research Center of Environment-Friendly Functional Materials, Ministry of Education;*

*Fujian Engineering Research Center of Green Functional Materials;*

*Institute of Materials Physical Chemistry, Huaqiao University, Xiamen 361021, China*

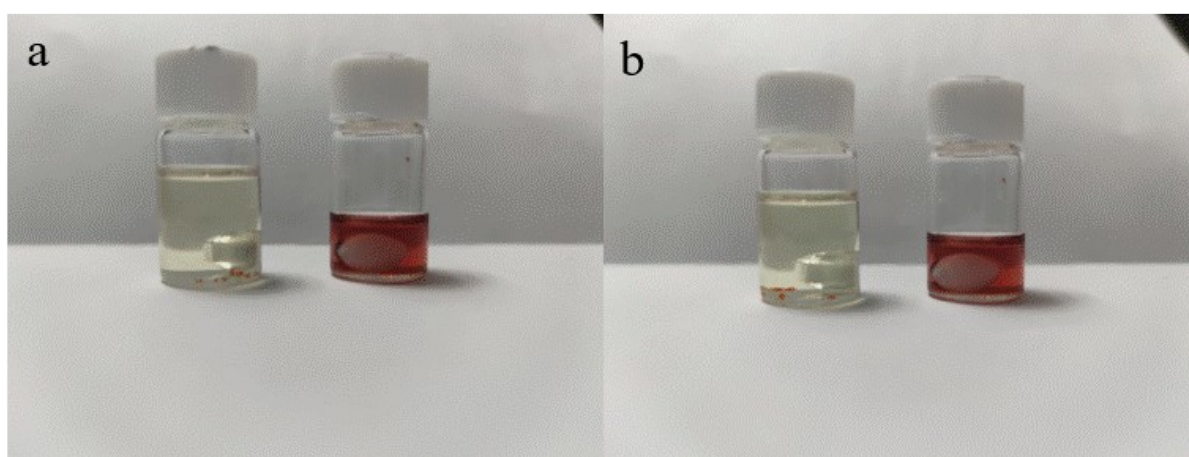

**Fig. S1** (a) Photograph of  $\text{K}_3[\text{Fe}(\text{CN})_4]$ -doped spiro-OMeTAD solutions with acetonitrile (left) and Li-TFSI+tBP (right). (b) Photograph of  $\text{K}_3[\text{Fe}(\text{CN})_4]$ -doped spiro-OMeTAD solutions with tBP (left) and Li-TFSI+tBP (right).

---

E-mail: [jhwu@hqu.edu.cn](mailto:jhwu@hqu.edu.cn) (J. Wu.)

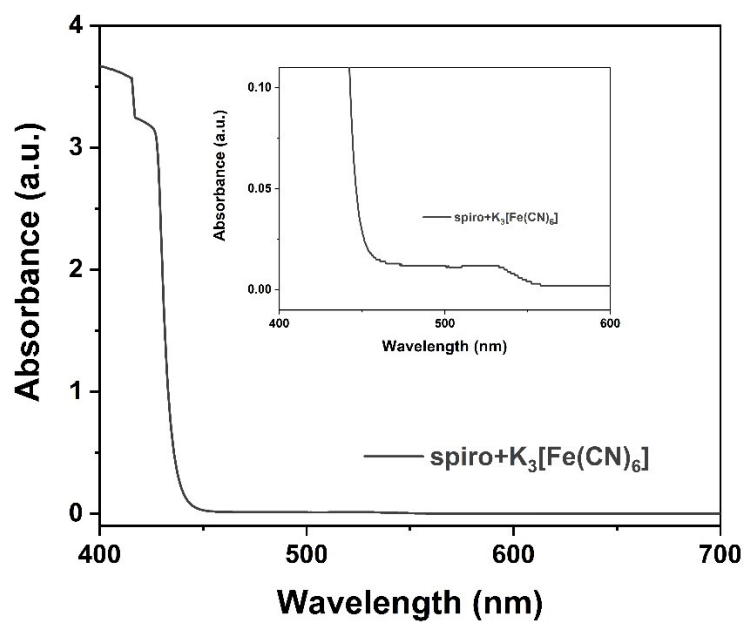

Fig. S2 UV-Vis absorption spectra of spiro-OMeTAD solution with only  $K_3[Fe(CN)_6]$ .

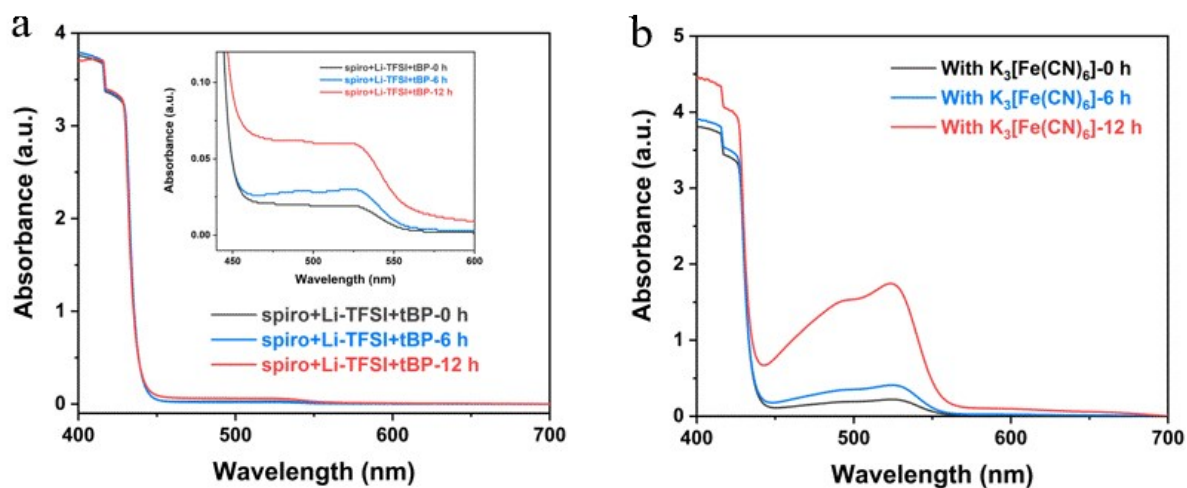

Fig. S3 UV-Vis absorption spectra of spiro-OMeTAD solution without (a) and with  $K_3[Fe(CN)_6]$  (b) in the presence of Li-TFSI and tBP at different oxidation times of 0, 6 and 12 h.

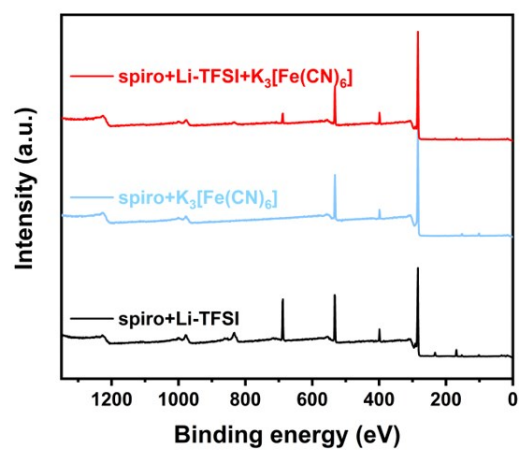

**Fig. S4** The survey spectra for the HTM doped with various additives.

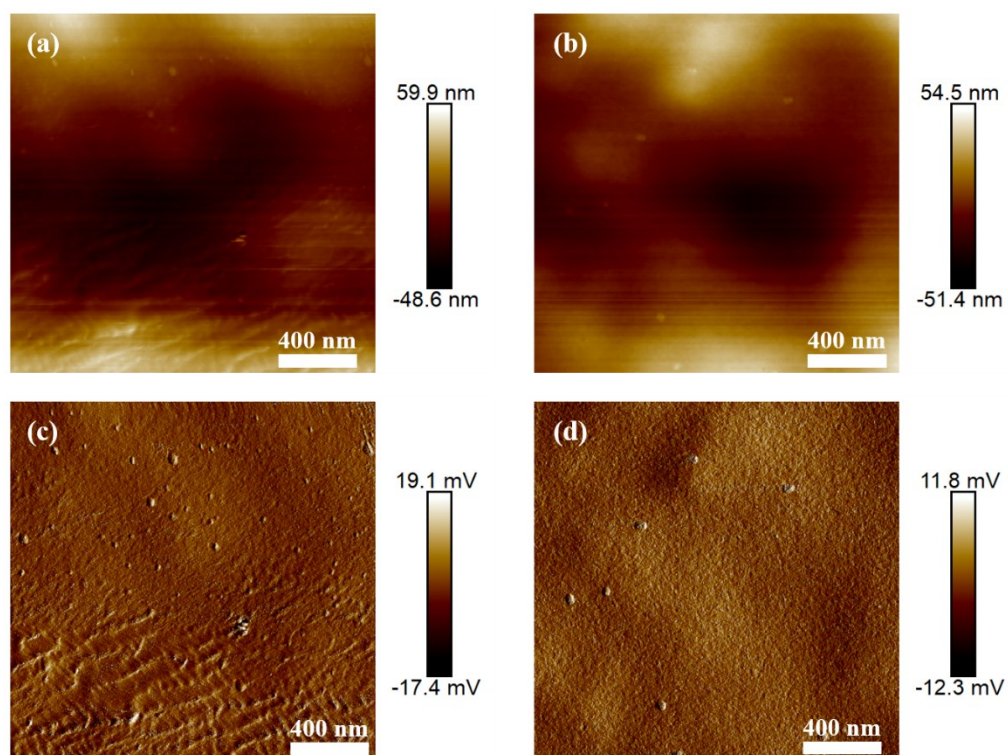

**Fig. S5** Tapping mode and intelligent mode AFM topography images of pristine (a and c) and K<sub>3</sub>[Fe(CN)<sub>4</sub>]-doped spiro-OMeTAD (b and d).

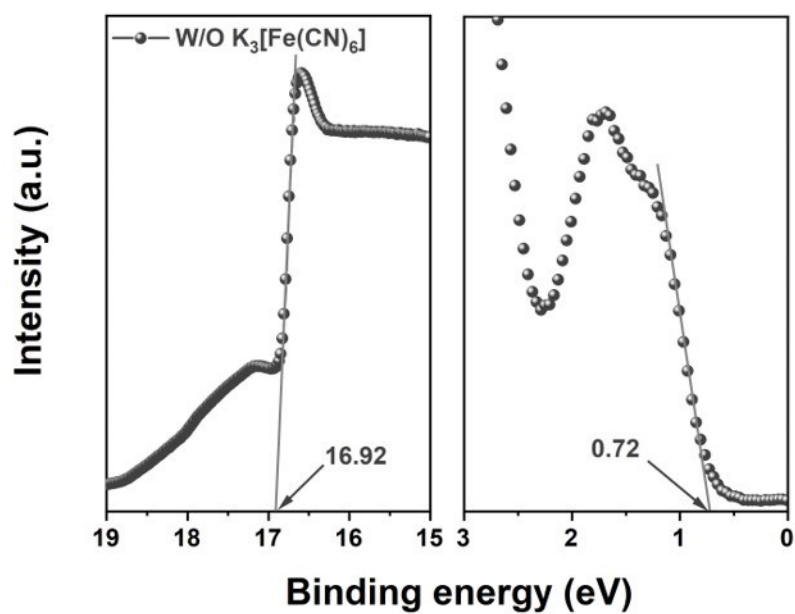

**Fig. S6** The UPS spectra for spiro-OMeTAD without  $\text{K}_3[\text{Fe}(\text{CN})_6]$  (left:  $E_{\text{cutoff}}$  region; right:  $E_{\text{onset}}$  region).

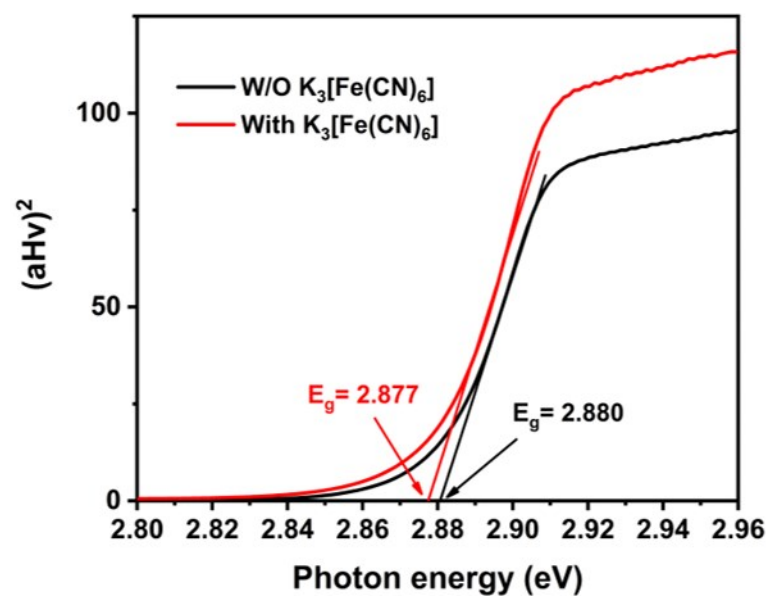

**Fig. S7** Tauc plots of the spiro-OMeTAD films with and without  $\text{K}_3[\text{Fe}(\text{CN})_6]$ .

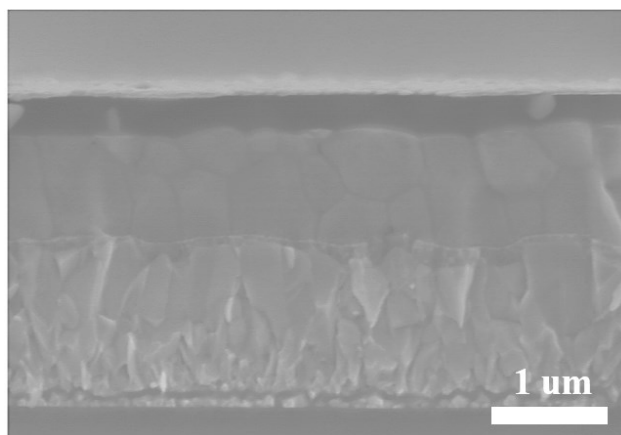

**Fig. S8** Cross-view SEM image of the undoped PSC device.

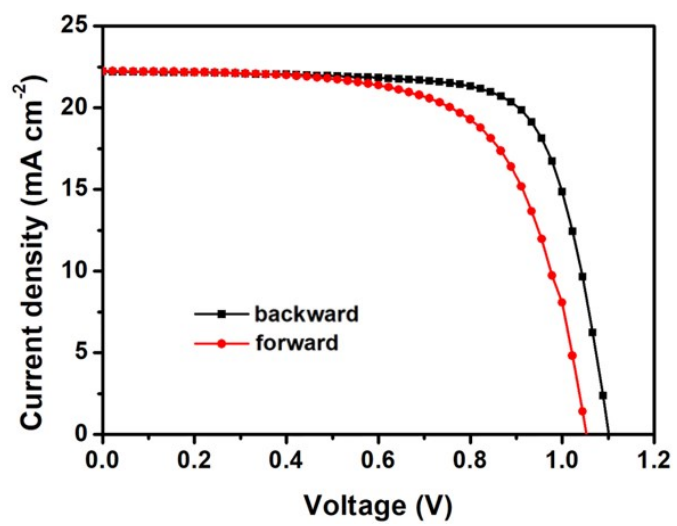

**Fig. S9** The  $J$ - $V$  curves of pristine PSCs measured with both forward and backward scans.

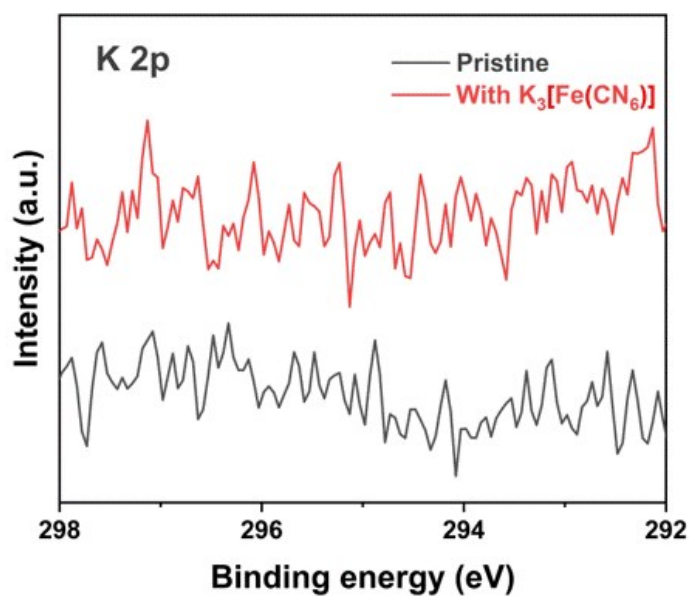

**Fig. S10** High resolution K 2p XPS spectra of the perovskite films which are firstly covered with  $K_3[Fe(CN)_6]$ -doped and pristine HTL and then washed by chlorobenzene.

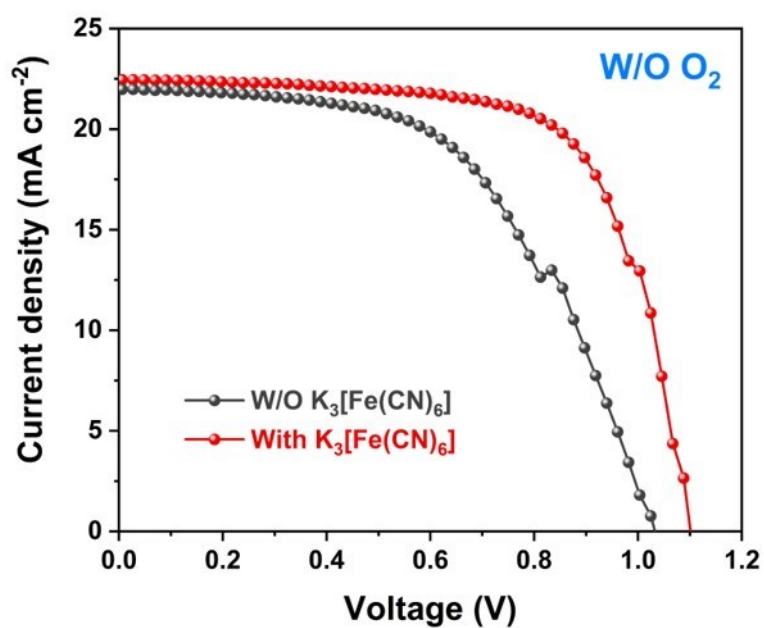

**Fig. S11** The  $J$ - $V$  curves of pristine and  $K_3[Fe(CN)_6]$ -modified PSCs without the overnight pre-oxidation.

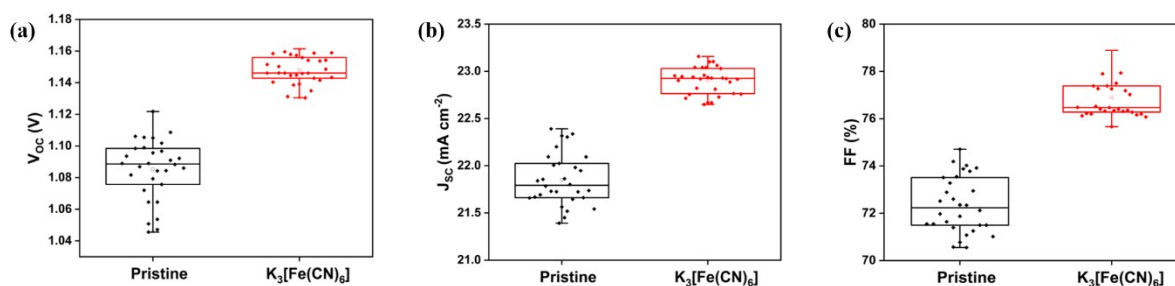

**Fig. S12** The statistical data of  $V_{oc}$ ,  $J_{sc}$  and FF based on 30 independent pristine and  $K_3[Fe(CN)_4]$ -doped devices.

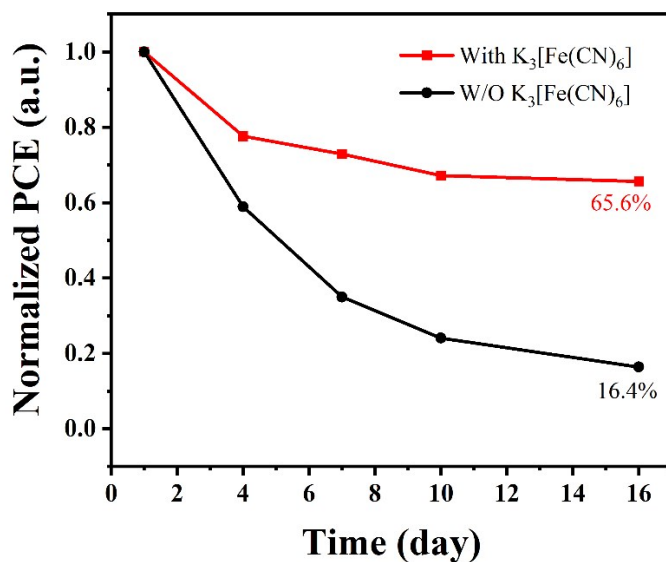

**Fig. S13** The long-term stability of solar cells with and without  $K_3[Fe(CN)_4]$  for 16 days.

**Table S1.** The conductivity values of the HTLs doped with different dopants.

| HTL with different dopants    | Conductivity ( $S\ cm^{-1}$ ) |
|-------------------------------|-------------------------------|
| None                          | $6.84 \times 10^{-4}$         |
| $K_3[Fe(CN)_4]$               | $6.99 \times 10^{-4}$         |
| Li-TFSI+tBP                   | $7.66 \times 10^{-4}$         |
| $K_3[Fe(CN)_4]$ + Li-TFSI+tBP | $1.09 \times 10^{-3}$         |

**Table S2.** Photovoltaic data of PSCs based on HTLs doping with different concentrations of  $K_3[Fe(CN)_4]$

| $K_3[Fe(CN)_4]$ concentration ( $mg\ mL^{-1}$ ) | $V_{oc}$ (V) | $J_{sc}$ ( $mA\ cm^{-2}$ ) | FF   | PCE (%) |
|-------------------------------------------------|--------------|----------------------------|------|---------|
| 0                                               | 1.10         | 22.22                      | 0.74 | 18.09   |
| 0.6                                             | 1.13         | 22.89                      | 0.75 | 19.40   |

|     |      |       |      |       |
|-----|------|-------|------|-------|
| 0.8 | 1.16 | 23.03 | 0.78 | 20.83 |
| 1.0 | 1.16 | 22.92 | 0.75 | 19.94 |

**Table S3.** Photovoltaic data of pristine and  $K_3[Fe(CN)_4]$ -modified devices with different scan directions.

| Device                    | Scan direction | $V_{OC}$ (V) | $J_{SC}$ ( $mA\ cm^{-2}$ ) | FF   | PCE (%) | HI    |
|---------------------------|----------------|--------------|----------------------------|------|---------|-------|
| Pristine                  | Backward       | 1.10         | 22.22                      | 0.74 | 18.09   | 0.157 |
|                           | Forward        | 1.04         | 22.23                      | 0.66 | 15.25   |       |
| $K_3[Fe(CN)_4]$ -modified | Backward       | 1.15         | 23.10                      | 0.76 | 20.19   | 0.072 |
|                           | Forward        | 1.10         | 22.98                      | 0.74 | 18.70   |       |

**Table S4.** Photovoltaic parameters of pristine and  $K_3[Fe(CN)_4]$ -modified PSCs without the overnight pre-oxidation

| devices         | $V_{OC}$ (V) | $J_{SC}$ ( $mA\ cm^{-2}$ ) | FF   | PCE (%) |
|-----------------|--------------|----------------------------|------|---------|
| Pristine        | 1.03         | 21.99                      | 0.54 | 12.23   |
| $K_3[Fe(CN)_4]$ | 1.10         | 22.46                      | 0.68 | 16.80   |

**Table S5.** TRPL data of FTO/perovskite and FTO/perovskite/spiro-OMeTAD with different dopants.

| samples    | $\tau_{ave}$ (ns) | $A_1$ (%) | $\tau_1$ (ns) | $A_2$ (%) | $\tau_2$ (ns) |
|------------|-------------------|-----------|---------------|-----------|---------------|
| Perovskite | 52.06             | 22.28     | 10.89         | 77.72     | 63.86         |



|                                                                       |       |       |       |       |       |
|-----------------------------------------------------------------------|-------|-------|-------|-------|-------|
| Perovskite/spiro-OMeTAD                                               | 17.45 | 47.09 | 5.822 | 52.91 | 27.80 |
| Perovskite/spiro-OMeTAD with<br>K <sub>3</sub> [Fe(CN) <sub>4</sub> ] | 8.21  | 53.42 | 2.70  | 46.58 | 14.53 |

---
